# Supplementary material
Source: Springer Nature journal article supplement (https://www.springermedizin.de/resource/supplementary/13046_2008_72_MOESM5_ESM.pdf/9661456)

Survival rate

PML -

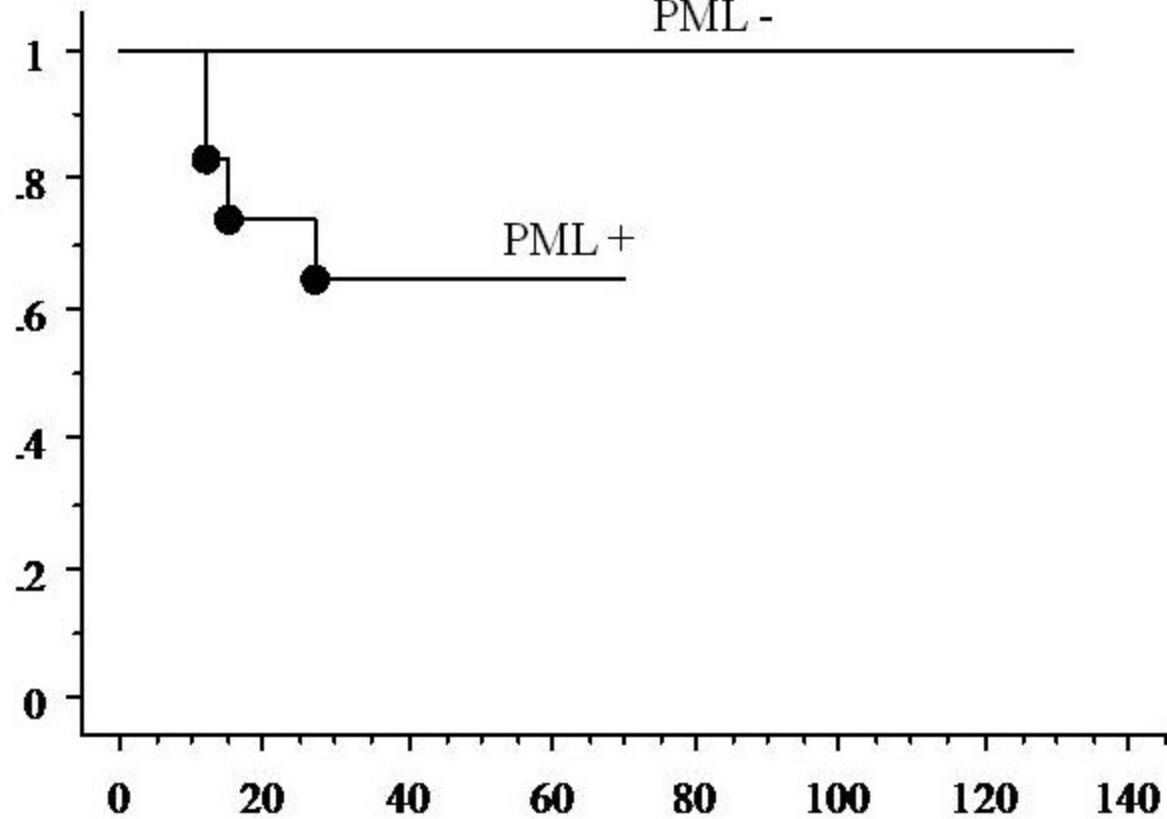

PML +

Months

Supplement: MOESM5 [file 9661456]
